# Supplementary material
Source: PubMed Central journal article supplement (PMC6551323)

**A.**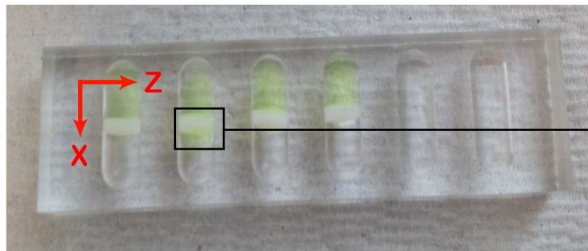**B.**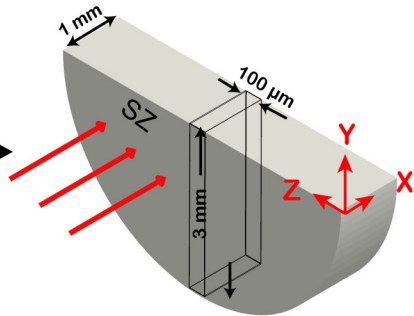**C.**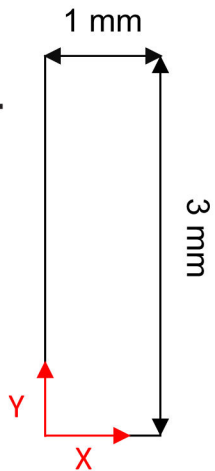

Supplement: NIHMS1006630-supplement-Fig_S1.pdf [file NIHMS1006630-supplement-Fig_S1.pdf]
